# Supplementary material for: Non-Overlapping Progesterone Receptor Cistromes Contribute to Cell-Specific Transcriptional Outcomes
Source: PubMed Central journal article supplement (PMC3335806; doi:10.1371/journal.pone.0035859), 2012-04-24

**A T-47D targets**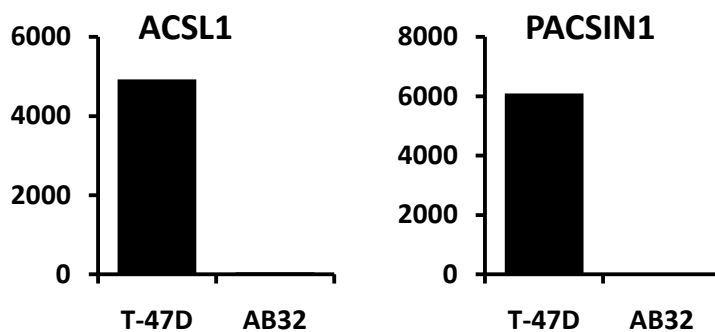**B AB32 targets**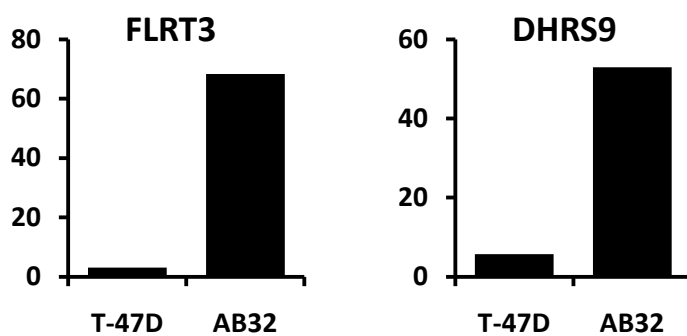**C Common targets**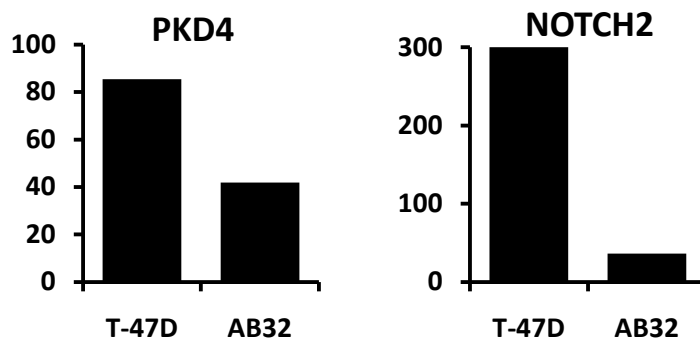

Supplement: pone.0035859.s007.pdf [file pone.0035859.s007.pdf]
