# Supplementary material for: Non-Overlapping Progesterone Receptor Cistromes Contribute to Cell-Specific Transcriptional Outcomes
Source: PubMed Central journal article supplement (PMC3335806; doi:10.1371/journal.pone.0035859), 2012-04-24

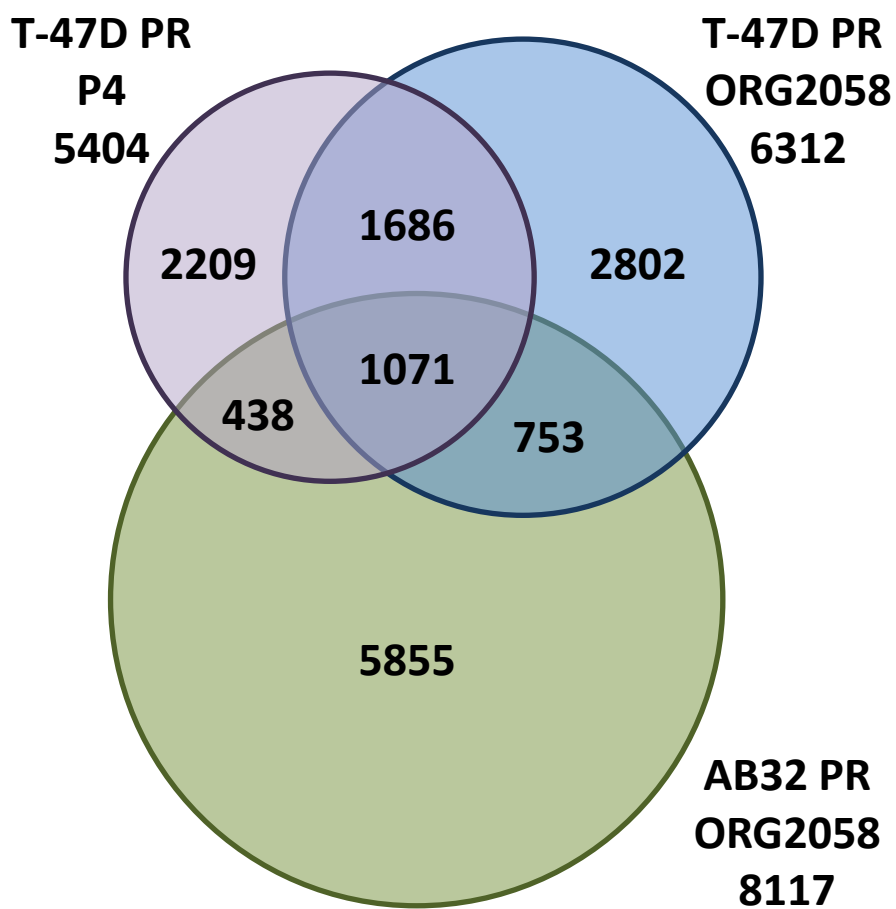

Supplement: pone.0035859.s008.pdf [file pone.0035859.s008.pdf]
