# Supplementary material for: Non-Overlapping Progesterone Receptor Cistromes Contribute to Cell-Specific Transcriptional Outcomes
Source: PubMed Central journal article supplement (PMC3335806; doi:10.1371/journal.pone.0035859), 2012-04-24
Supplement: pone.0035859.s016.pdf [file pone.0035859.s016.pdf]

**Table S1: Summary of gene functional annotation by chromosome in AB32**

Gene ontology term enrichment was determined for the subset of PR binding region-associated genes in AB32 cells on chromosomes 2, 8 and 11.

| <b>Chr 2 (58 IDs)</b>     |                         |                 |
|---------------------------|-------------------------|-----------------|
| <b>Annotation Cluster</b> | <b>Enrichment Score</b> | <b>Function</b> |
| 1                         | 2.75                    | Metabolism      |
| 2                         | 1.61                    | GTPase activity |
| 3                         | 0.91                    | Metabolism      |

  

| <b>Chr 8 (25 IDs)</b>     |                         |                            |
|---------------------------|-------------------------|----------------------------|
| <b>Annotation Cluster</b> | <b>Enrichment Score</b> | <b>Function</b>            |
| 1                         | 1.62                    | Apoptosis                  |
| 4                         | 0.72                    | Catabolism                 |
| 6                         | 0.55                    | Transcriptional regulation |
| 7                         | 0.52                    | Apoptosis                  |
| 8                         | 0.39                    | Nucleotide binding         |
| 11                        | 0.11                    | Metal ion binding          |

  

| <b>Chr 11 (39 IDs)</b>    |                         |                            |
|---------------------------|-------------------------|----------------------------|
| <b>Annotation Cluster</b> | <b>Enrichment Score</b> | <b>Function</b>            |
| 1                         | 1.57                    | Metabolism                 |
| 3                         | 0.73                    | DNA repair                 |
| 4                         | 0.72                    | Protein complex assembly   |
| 5                         | 0.70                    | Transcriptional regulation |
| 6                         | 0.63                    | Phosphorylation            |
| 7                         | 0.51                    | Transcriptional regulation |
| 8                         | 0.37                    | Apoptosis                  |
