# Supplementary material for: Non-Overlapping Progesterone Receptor Cistromes Contribute to Cell-Specific Transcriptional Outcomes
Source: PubMed Central journal article supplement (PMC3335806; doi:10.1371/journal.pone.0035859), 2012-04-24
Supplement: pone.0035859.s017.pdf [file pone.0035859.s017.pdf]

**Table S2** - Validation of top PR binding regions**T-47D**

| Region ID | Region position |           | Peak Height | PRE p-value | PRE score | Validation: Fold enrichment |       |
|-----------|-----------------|-----------|-------------|-------------|-----------|-----------------------------|-------|
|           | chromosome      | start     |             |             |           |                             | end   |
| T47D4122  | chr3            | 184316710 | 184317034   | 40.7        | 3.96E-05  | ++                          | 3.97  |
| T47D6084  | chr9            | 122679651 | 122680502   | 26.2        | 2.55E-06  | +++                         | 5.68  |
| T47D6046  | chr9            | 111991161 | 111991613   | 24.1        | 7.76E-04  | ++                          | 46.53 |
| T47D1380  | chr11           | 128699096 | 128700220   | 20.9        | 2.07E-04  | ++                          | 4.08  |
| T47D2524  | chr16           | 84310655  | 84311589    | 20.8        | 4.35E-04  | ++                          | 1.29  |
| T47D283   | chr1            | 120376407 | 120376763   | 20.2        | 6.29E-04  | ++                          | 7.14  |
| T47D3464  | chr20           | 44776235  | 44776939    | 20.1        | 1.24E-04  | ++                          | 12.27 |
| T47D5837  | chr8            | 102519793 | 102520361   | 19.1        | 2.03E-03  | +                           | 13.06 |
| T47D3514  | chr20           | 57834740  | 57835410    | 14.6        | 8.84E-07  | +++                         | 4.34  |
| T47D4818  | chr5            | 148845545 | 148845884   | 12.9        | 1.20E-04  | ++                          | 13.29 |

**AB32**

| Region ID | Region position |           | Peak Height | PRE p-value | PRE score | Validation: Fold enrichment |       |
|-----------|-----------------|-----------|-------------|-------------|-----------|-----------------------------|-------|
|           | chromosome      | start     |             |             |           |                             | end   |
| AB32399   | chr1            | 143957617 | 143957902   | 13.2        | 6.32E-07  | +++                         | 6.49  |
| AB326156  | chr5            | 141702092 | 141702799   | 9.2         | 7.33E-04  | ++                          | 2.01  |
| AB326110  | chr5            | 134596597 | 134597211   | 8.4         | 3.69E-06  | +++                         | 16.08 |
| AB324311  | chr2            | 223025077 | 223026178   | 7.9         | 1.38E-05  | ++                          | 9.92  |
| AB324058  | chr2            | 114040782 | 114041064   | 7.8         | 3.66E-04  | ++                          | 1.24  |
| AB32833   | chr1            | 227827184 | 227827908   | 7.8         | 7.33E-04  | ++                          | 6.28  |
| AB323972  | chr2            | 91137645  | 91137989    | 7.8         | 6.73E-05  | ++                          | 2.86  |
| AB324554  | chr20           | 33358266  | 33358837    | 7.2         | 3.51E-08  | +++                         | 0.91  |
| AB32810   | chr1            | 223989877 | 223991355   | 7.2         | 5.12E-04  | ++                          | 2.21  |
