# Supplementary material for: Non-Overlapping Progesterone Receptor Cistromes Contribute to Cell-Specific Transcriptional Outcomes
Source: PubMed Central journal article supplement (PMC3335806; doi:10.1371/journal.pone.0035859), 2012-04-24
Supplement: pone.0035859.s018.pdf [file pone.0035859.s018.pdf]

**Table S3: Functional analysis of progestin regulated gene clusters lost, gained and conserved with expression of FOXA1.**

| <b>Functional group</b>               | <b>Enrichment Score</b> |
|---------------------------------------|-------------------------|
| <b><i>Lost</i></b>                    |                         |
| Apoptosis                             | 6.68                    |
| Steroid biosynthesis                  | 2.90                    |
| Regulation of protein kinase activity | 2.41                    |
| Protein transport                     | 2.17                    |
| <b><i>Gained</i></b>                  |                         |
| Blood vessel morphogenesis            | 3.28                    |
| Cell motility                         | 2.03                    |
| <b><i>Conserved</i></b>               |                         |
| Mitotic cell cycle                    | 4.37                    |
| Wound healing                         | 3.55                    |
| Apoptosis                             | 2.40                    |
